# Supplementary material for: Innovative Alcoholic Drinks Obtained by Co-Fermenting Grape Must and Fruit Juice
Source: PubMed Central journal article supplement (PMC6571751; doi:10.3390/metabo9050086), 2019-04-30
Supplement: metabolites-09-00086-s001.pdf [file metabolites-09-00086-s001.pdf]

1 **Table S1**

2 Ethanol yield in the flask fermentation trials fermented with *S. cerevisiae* EC1118 (*S. c.*) and *T. delbrueckii*  
 3 UMY196 (*T. d.*). Different letters mean significant difference among different grape must/fruit drink obtained  
 4 with the same fruit juice. \*: significant difference between the two yeast species fermenting the same grape  
 5 must/fruit juice mix; ns: not significant.  
 6

| Must                  | Proportion |              | Cherry             |     | Kiwi |     | Peach               |         | Strawberry          |         |
|-----------------------|------------|--------------|--------------------|-----|------|-----|---------------------|---------|---------------------|---------|
| Cabernet<br>Sauvignon | 80:20      | <i>S. c.</i> | 91±9 <sup>ab</sup> |     | 93±3 |     | 98±10 <sup>ab</sup> |         | 92±3 <sup>a</sup>   |         |
|                       |            | <i>T. d.</i> | 84±4 <sup>ab</sup> | ns* | 81±2 | ns* | 83±8 <sup>a</sup>   | ns*     | 101±13 <sup>a</sup> | ns*     |
|                       | 60:40      | <i>S. c.</i> | 104±7 <sup>b</sup> |     | 97±2 |     | 109±13 <sup>b</sup> |         | 83±1 <sup>a</sup>   |         |
|                       |            | <i>T. d.</i> | 94±6 <sup>b</sup>  | ns* | 92±3 | ns* | 90±9 <sup>ab</sup>  | 0.0192* | 89±11 <sup>ab</sup> | ns*     |
| Chardonnay            | 80:20      | <i>S. c.</i> | 86±7 <sup>a</sup>  |     | 92±1 |     | 95±10 <sup>ab</sup> |         | 112±6 <sup>b</sup>  |         |
|                       |            | <i>T. d.</i> | 82±4 <sup>a</sup>  | ns* | 88±1 | ns* | 103±13 <sup>b</sup> | ns*     | 81±12 <sup>b</sup>  | 0.0002* |
|                       | 60:40      | <i>S. c.</i> | 83±8 <sup>a</sup>  |     | 92±1 |     | 92±7 <sup>a</sup>   |         | 122±25 <sup>b</sup> |         |
|                       |            | <i>T. d.</i> | 77±14 <sup>a</sup> | ns* | 87±1 | ns* | 98±17 <sup>ab</sup> | ns*     | 88±22 <sup>ab</sup> | 0.0000* |

7

8 **Supplementary S2**  
 9 Chemical parameters determined for the fermentation trial with must/cherry juice fermented with *S. cerevisiae*  
 10 EC1118 (*S. c.*) and *T. delbrueckii* UMY196 (*T. d.*).  
 11

| Must               | Proportion* | Fermenting yeast | Sugar (g/L)  |              | Ethanol (v/v) |              | Total acidity (g tartaric acid/L) |              |
|--------------------|-------------|------------------|--------------|--------------|---------------|--------------|-----------------------------------|--------------|
|                    |             |                  | <i>S. c.</i> | <i>T. d.</i> | <i>S. c.</i>  | <i>T. d.</i> | <i>S. c.</i>                      | <i>T. d.</i> |
| Cabernet Sauvignon | 80:20       | T0               | 217±20       | 227±20       | --            | --           | 5.7±0.2                           | 5.4±0.2      |
|                    |             | EF               | 0.44±0.08    | 0.84±0.23    | 12.7±0.1      | 12.3±0.7     | 6.5±0.1                           | 8.7±0.1      |
|                    | 60:40       | T0               | 177±16       | 187±17       | --            | --           | 6.0±0.2                           | 6.3±0.3      |
|                    |             | EF               | 0.42±0.08    | 0.12±0.02    | 11.9±0.4      | 11.3±0.4     | 6.7±0.1                           | 9.1±0.7      |
| Chardonnay         | 80:20       | T0               | 162±15       | 187±17       | --            | --           | 7.5±0.3                           | 6.3±0.3      |
|                    |             | EF               | 0.15±0.03    | 1.00±0.00    | 8.9±0.1       | 9.8±0.5      | 8.6±0.3                           | 10.8±0.1     |
|                    | 60:40       | T0               | 138±12       | 173±16       | --            | --           | 6.3±0.3                           | 7.2±0.3      |
|                    |             | EF               | n.d.         | 0.50±0.23    | 7.4±0.0       | 8.5±1.1      | 6.7±0.1                           | 10.8±0.1     |

12 \*: the proportion is related to must:cherry juice (v/v).  
 13 Legend: T0: concentrations of chemical parameters in kiwi juice/must; EF concentrations of chemical  
 14 parameters in mixed-cherry wine at the end of alcoholic fermentation; n.d.: not detected.

15 **Supplementary S3**  
 16 Chemical parameters determined for the fermentation trial with must/peach juice fermented with *S. cerevisiae*  
 17 EC1118 (*S. c.*) and *T. delbrueckii* UMY196 (*T. d.*).  
 18

| Must               | Proportion* | Fermenting yeast | Sugar (g/L)  |              | Ethanol (v/v) |              | Total acidity (g tartaric acid/L) |              |
|--------------------|-------------|------------------|--------------|--------------|---------------|--------------|-----------------------------------|--------------|
|                    |             |                  | <i>S. c.</i> | <i>T. d.</i> | <i>S. c.</i>  | <i>T. d.</i> | <i>S. c.</i>                      | <i>T. d.</i> |
| Cabernet Sauvignon | 80:20       | T0               | 187±17       | 214±19       | --            | --           | 4.8±0.2                           | 4.5±0.2      |
|                    |             | EF               | 0.19±0.02    | 0.10±0.00    | 11.7±0.3      | 11.4±0.1     | 9.3±0.9                           | 7.3±0.3      |
|                    | 60:40       | T0               | 147±13       | 180±16       | --            | --           | 4.4±0.2                           | 4.4±0.2      |
|                    |             | EF               | 0.05±0.03    | 0.17±0.05    | 10.3±0.4      | 10.4±0.1     | 6.4±0.0                           | 7.5±0.0      |
| Chardonnay         | 80:20       | T0               | 153±14       | 153±14       | --            | --           | 6.6±0.3                           | 6.9±0.3      |
|                    |             | EF               | 0.10±0.05    | 0.18±0.03    | 9.4±0.2       | 10.2±0.4     | 8.3±0.3                           | 9.5±0.4      |
|                    | 60:40       | T0               | 140±13       | 113±10       | --            | --           | 6.2±0.2                           | 5.1±0.2      |
|                    |             | EF               | 0.08±0.03    | 0.08±0.07    | 8.3±0.3       | 7.1±0.6      | 8.3±0.1                           | 8.0±0.4      |

19 \*: the proportion is related to must:peach juice (v/v).  
 20 Legend: T0: concentrations of chemical parameters in kiwi juice/must; EA concentrations of chemical  
 21 parameters in mixed-peach wine at the end of alcoholic fermentation; n.d.: not detected.

22 **Supplementary S4**  
 23 Chemical parameters determined for the fermentation trial with must/strawberry juice fermented with *S.*  
 24 *cerevisiae* EC1118 (*S. c.*) and *T. delbrueckii* UMY196 (*T. d.*).  
 25

| Must               | Proportion* | Fermenting yeast | Sugar (g/L)  |              | Ethanol (v/v) |              | Total acidity (g tartaric acid/L) |              |
|--------------------|-------------|------------------|--------------|--------------|---------------|--------------|-----------------------------------|--------------|
|                    |             |                  | <i>S. c.</i> | <i>T. d.</i> | <i>S. c.</i>  | <i>T. d.</i> | <i>S. c.</i>                      | <i>T. d.</i> |
| Cabernet Sauvignon | 80:20       | T0               | 167±15       | 168±15       | --            | --           | 5.9±0.2                           | 5.1±0.2      |
|                    |             | EF               | n.d.         | 44±5         | 9.9±0.9       | 7.9±0.3      | 7.5±0                             | 8.8±0.3      |
|                    | 60:40       | T0               | 146±13       | 151±14       | --            | --           | 6.3±0.3                           | 5.3±0.2      |
|                    |             | EF               | n.d.         | 2.5±1.5      | 7.9±1.1       | 8.5±0.4      | 6.8±0.3                           | 9.5±0.5      |
| Chardonnay         | 80:20       | T0               | 92±8         | 94±8         | --            | --           | 5.1±0.2                           | 4.8±0.2      |
|                    |             | EF               | n.d.         | n.d.         | 6.7±0.3       | 4.9±0.4      | 6±0.4                             | 6.9±0        |
|                    | 60:40       | T0               | 64±6         | 79±7         | --            | --           | 5.7±0.2                           | 6±0.2        |
|                    |             | EF               | n.d.         | n.d.         | 5.0±0.8       | 4.4±1.0      | 6.3±0.2                           | 7.7±0.2      |

26 \*: the proportion is related to must:strawberry juice (v/v).  
 27 Legend: T0: concentrations of chemical parameters in kiwi juice/must; EA concentrations of chemical  
 28 parameters in mixed-strawberry wine at the end of alcoholic fermentation; n.d.: not detected.
